# Supplementary material
Source: PubMed Central journal article supplement (PMC4898652)

Increased competition:  
Smaller capacity

Same-category

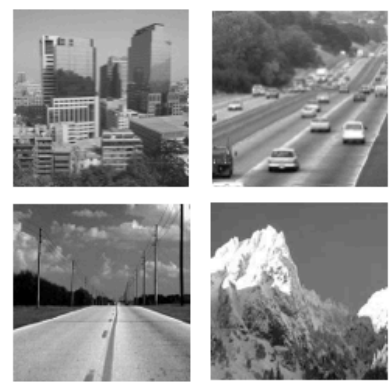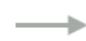

Scene activation

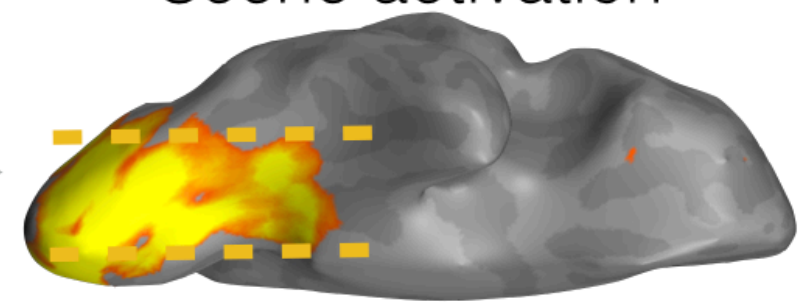

Face activation

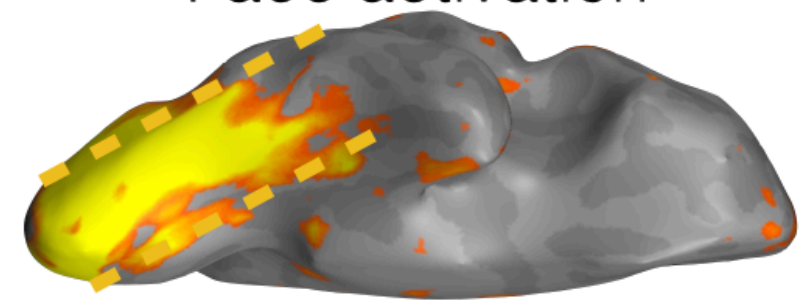

Scene activation

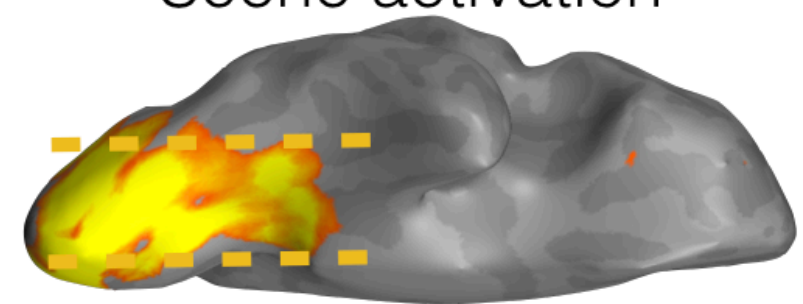

Decreased competition:  
Larger capacity

Mixed-category

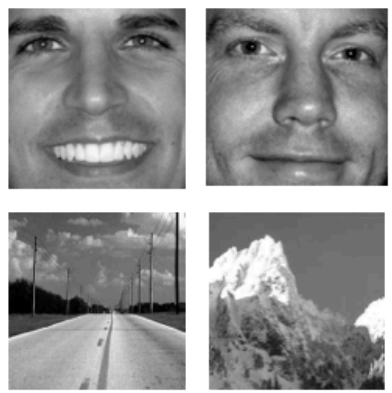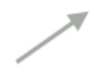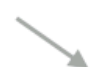

Supplement: NIHMS769621-supplement-Suppl_2.pdf [file NIHMS769621-supplement-Suppl_2.pdf]
