# Supplementary material
Source: PubMed Central journal article supplement (PMC4898652)

Original image

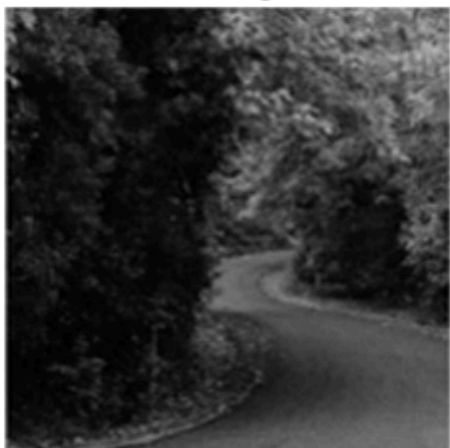

Preserved statistics

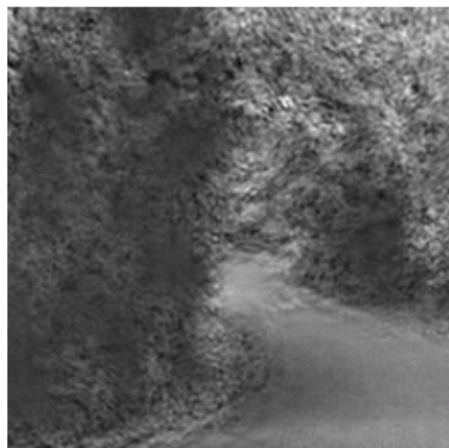

Original image

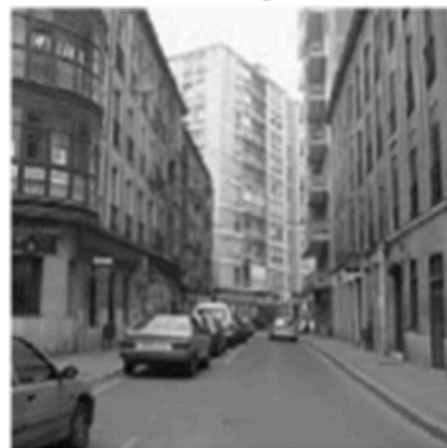

Preserved statistics

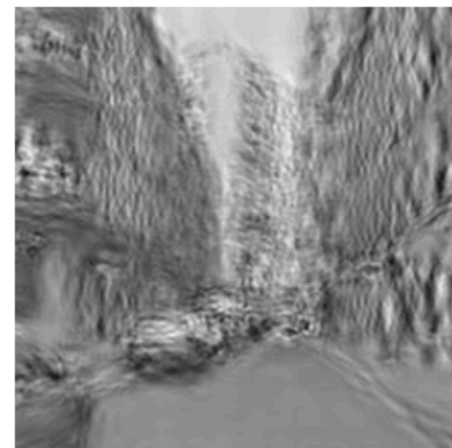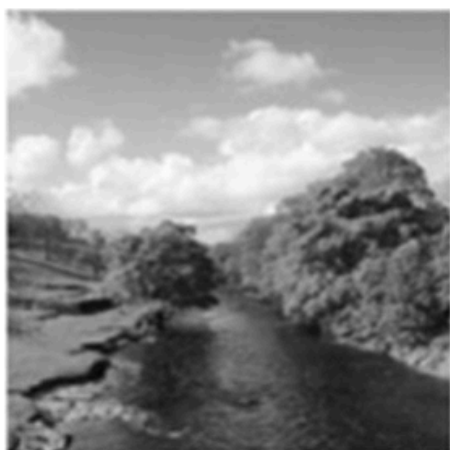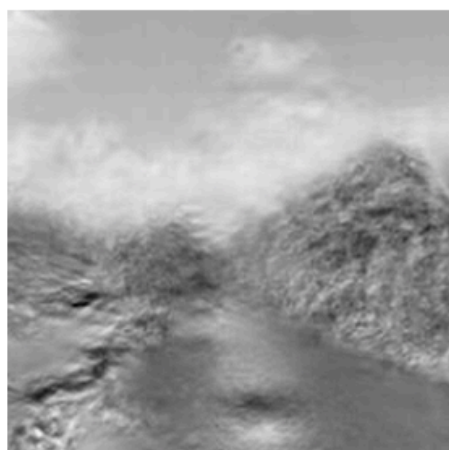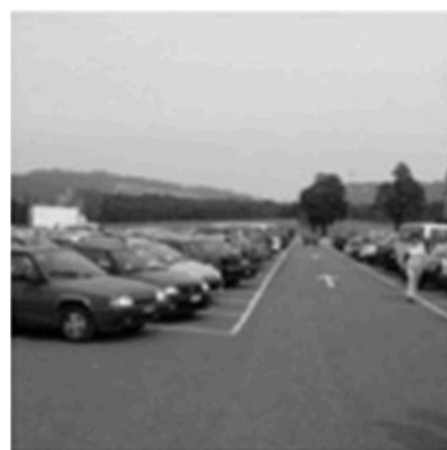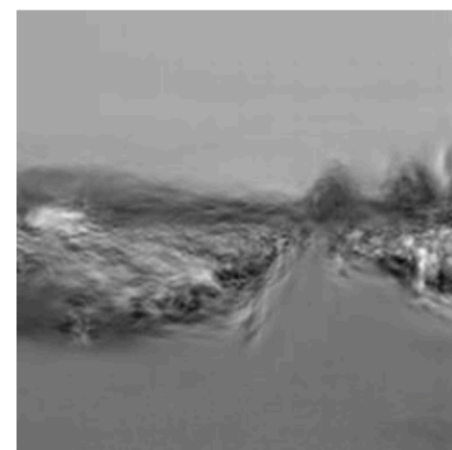

Supplement: NIHMS769621-supplement-Suppl_1.pdf [file NIHMS769621-supplement-Suppl_1.pdf]
